# Supplementary material for: KNa0.78Eu0.27In3.80B12S12: a novel hexanary thioborate featuring a B12S12 cluster and diverse InSx (x = 4, 5, 6) units
Source: Royal Society of Chemistry journal article supplement (doi:10.1039/d2qi00520d), 2022-01-01
Supplement: d2qi00520d1.pdf [file d2qi00520d1.pdf]

## *Supporting Information*

### **KNa<sub>0.78</sub>Eu<sub>0.27</sub>In<sub>3.80</sub>B<sub>12</sub>S<sub>12</sub>: A Novel Hexanary Thioborate Featuring B<sub>12</sub>S<sub>12</sub> Cluster and Diverse InS<sub>x</sub> (x = 4, 5, 6) Units**

Shan-Shan Han, Su-Xin Yu, Wenlong Liu and Sheng-Ping Guo\*

†School of Chemistry and Chemical Engineering, Yangzhou University, Yangzhou 225002, P.

R. China

Corresponding author: spguo@yzu.edu.cn

**Table S1.** EDS analysis for **1**

| <b>Single crystal</b> | <b>#1</b> | <b>#2</b> | <b>#3</b> |
|-----------------------|-----------|-----------|-----------|
| In                    | 20.92     | 20.83     | 21.66     |
| Eu                    | 1.74      | 1.56      | 1.69      |
| In/Eu                 | 12.02     | 13.35     | 13.82     |

**Table S2.** The Rietveld powder XRD pattern refinement result.

|       | <i>R</i> (obs) | <i>wR</i> (obs) | <i>R</i> (all) | <i>wR</i> (all) | <i>R</i> <sub>p</sub> | <i>wR</i> <sub>p</sub> |
|-------|----------------|-----------------|----------------|-----------------|-----------------------|------------------------|
| value | 4.35           | 5.25            | 4.36           | 5.26            | 3.19                  | 4.27                   |

**Table S3.** Atomic coordinates ( $\times 10^4$ ) and equivalent isotropic displacement parameters ( $U_{\text{eq}}^a$ ,  $\text{\AA}^2 \times 10^3$ ) for **1**.

| Atom   | Wyck. site | $x$        | $y$        | $z$        | $U_{\text{eq}}/\text{\AA}^2$ | SOF   |
|--------|------------|------------|------------|------------|------------------------------|-------|
| K(1)   | $4i$       | 3869.2(18) | 0          | 8308.4(18) | 47.1(6)                      | 1     |
| Na(1A) | $4i$       | 5487(5)    | 5000       | 4678(5)    | 42(2)                        | 0.564 |
| Na(1B) | $2c$       | 5000       | 5000       | 5000       | 42(2)                        | 0.436 |
| Eu(1)  | $4f$       | 2500       | 2500       | 5000       | 35.6(7)                      | 0.268 |
| In(1)  | $4e$       | 7500       | 2500       | 10000      | 20.7(3)                      | 0.798 |
| In(2)  | $4i$       | 7563.8(4)  | 0          | 7464.1(4)  | 20.15(17)                    | 1     |
| In(3)  | $8j$       | 5353.4(3)  | 2688.6(4)  | 7381.2(3)  | 23.33(15)                    | 1     |
| B(1)   | $4i$       | 4953(6)    | 5000       | 8835(6)    | 16.4(19)                     | 1     |
| B(2)   | $4i$       | 6151(6)    | 0          | 5349(6)    | 13.8(18)                     | 1     |
| B(3)   | $4i$       | 5467(6)    | 0          | 6158(6)    | 12.9(18)                     | 1     |
| B(4)   | $8j$       | 4456(4)    | 863(6)     | 5675(4)    | 13.9(13)                     | 1     |
| B(5)   | $4i$       | 6027(6)    | 5000       | 9712(6)    | 14.6(19)                     | 1     |
| B(6)   | $8j$       | 5315(4)    | 3622(6)    | 9558(4)    | 14.5(13)                     | 1     |
| B(7)   | $8j$       | 4486(4)    | 1407(6)    | 4527(4)    | 12.7(12)                     | 1     |
| B(8)   | $8j$       | 5853(4)    | 4142(6)    | 10716(4)   | 15.8(13)                     | 1     |
| S(1)   | $5i$       | 5938.5(13) | 0          | 7449.7(13) | 16.6(4)                      | 1     |
| S(2)   | $4i$       | 7430.2(13) | 0          | 5754.8(13) | 17.8(4)                      | 1     |
| S(3)   | $8j$       | 3902.2(9)  | 1744.9(15) | 6482.4(10) | 19.1(3)                      | 1     |
| S(4)   | $4i$       | 4820.5(15) | 5000       | 7541.4(13) | 21.6(5)                      | 1     |
| S(5)   | $8j$       | 8233.1(9)  | 1837.5(14) | 8501.7(10) | 18.2(3)                      | 1     |
| S(6)   | $8j$       | 6095.5(10) | 2866.1(15) | 6079.8(10) | 21.2(3)                      | 1     |
| S(7)   | $8j$       | 5689.3(10) | 2126.2(14) | 9094.0(10) | 20.0(3)                      | 1     |
| S(8)   | $4i$       | 7143.8(15) | 5000       | 9412.6(16) | 36.3(6)                      | 1     |

<sup>a</sup> $U_{\text{eq}}$  is defined as one third of the trace of the orthogonalized  $U_{ij}$  tensor.

**Table S4.** Selected bond distances (Å) for **1**.<sup>a</sup>

| <b>Bond</b>   | <b>Dist.</b> | <b>Bond</b>  | <b>Dist.</b> |
|---------------|--------------|--------------|--------------|
| Eu(1)–S(2)#8  | 2.8478(8)    | B(1)–B(5)    | 1.799(12)    |
| Eu(1)–S(2)#9  | 2.8478(8)    | B(1)–B(6)#7  | 1.786(8)     |
| Eu(1)–S(3)    | 2.7360(14)   | B(1)–B(6)    | 1.786(8)     |
| Eu(1)–S(3)#10 | 2.7360(14)   | B(1)–B(8)#12 | 1.779(9)     |
| Eu(1)–S(6)#5  | 2.9966(14)   | B(1)–B(8)#13 | 1.779(9)     |
| Eu(1)–S(6)#3  | 2.9966(14)   | B(2)–B(3)    | 1.769(12)    |
| K(1)–S(1)     | 3.687(3)     | B(2)–B(4)#5  | 1.786(9)     |
| K(1)–S(3)#1   | 3.243(2)     | B(2)–B(4)#9  | 1.786(9)     |
| K(1)–S(3)     | 3.243(2)     | B(2)–B(7)#9  | 1.797(8)     |
| K(1)–S(5)#2   | 3.4754(17)   | B(2)–B(7)#5  | 1.797(8)     |
| K(1)–S(5)#3   | 3.4754(17)   | B(3)–B(4)#1  | 1.768(9)     |
| K(1)–S(7)     | 3.508(2)     | B(3)–B(4)    | 1.768(9)     |
| K(1)–S(7)#1   | 3.508(2)     | B(3)–B(7)#9  | 1.789(8)     |
| K(1)–S(8)#2   | 3.425(3)     | B(3)–B(7)#5  | 1.789(8)     |
| Na(1A)–S(4)#4 | 3.155(7)     | B(4)–B(4)#1  | 1.803(13)    |
| Na(1A)–S(6)#5 | 3.261(6)     | B(4)–B(7)#5  | 1.806(8)     |
| Na(1A)–S(6)#7 | 3.007(5)     | B(4)–B(7)    | 1.783(8)     |
| Na(1A)–S(6)   | 3.007(5)     | B(5)–B(6)    | 1.782(8)     |
| Na(1A)–S(6)#4 | 3.261(6)     | B(5)–B(6)#7  | 1.782(8)     |
| In(1)–S(5)    | 2.7917(14)   | B(5)–B(8)#7  | 1.796(9)     |
| In(1)–S(5)#11 | 2.7917(14)   | B(5)–B(8)    | 1.796(9)     |
| In(1)–S(7)    | 2.7634(15)   | B(6)–B(6)#12 | 1.798(12)    |
| In(1)–S(7)#11 | 2.7634(15)   | B(6)–B(8)    | 1.764(8)     |
| In(1)–S(8)#11 | 2.7588(8)    | B(6)–B(8)#12 | 1.805(8)     |
| In(1)–S(8)    | 2.7588(8)    | B(7)–B(7)#5  | 1.802(12)    |

|              |            |              |           |
|--------------|------------|--------------|-----------|
| In(2)–S(1)   | 2.474(2)   | B(8)–B(8)#7  | 1.793(14) |
| In(2)–S(2)   | 2.4528(19) | B(1)–S(4)    | 1.849(9)  |
| In(2)–S(5)#1 | 2.4946(15) | B(1)–S(4)#7  | 1.849(9)  |
| In(2)–S(5)   | 2.4947(15) | B(2)–S(2)    | 1.886(9)  |
| In(3)–S(1)   | 2.9409(8)  | B(3)–S(1)    | 1.838(9)  |
| In(3)–S(3)   | 2.4675(15) | B(4)–S(3)    | 1.863(6)  |
| In(3)–S(4)#7 | 2.5778(9)  | B(5)–S(8)    | 1.866(9)  |
| In(3)–S(4)   | 2.5778(9)  | B(6)–S(7)    | 1.852(6)  |
| In(3)–S(6)   | 2.4596(14) | B(7)–S(6)#5  | 1.868(6)  |
| In(3)–S(7)   | 2.4915(14) | B(8)–S(5)#11 | 1.863(6)  |

---

Symmetry codes: #1  $+x, -y, +z$ ; #2  $-1/2+x, -1/2+y, +z$ ; #3  $-1/2+x, 1/2-y, +z$ ; #4  $1-x, 1-y, 1-z$ ; #5  $1-x, +y, 1-z$ ; #6  $1/2+x, 1/2+y, +z$ ; #7  $+x, 1-y, +z$ ; #8  $-1/2+x, 1/2+y, +z$ ; #9  $1-x, -y, 1-z$ ; #10  $1/2-x, 1/2-y, 1-z$ ; #11  $3/2-x, 1/2-y, 2-z$ ; #12  $1-x, +y, 2-z$ ; #13  $1-x, 1-y, 2-z$ .

**Table S5.** The incomplete occupations of Eu and In in literature.

| <b>Compounds</b>                               | <b>Occupancy</b> | <b>Ref.</b> |
|------------------------------------------------|------------------|-------------|
| $\text{Eu}_{1.836}\text{Ta}_{15}\text{O}_{32}$ | 0.306 for Eu     | 1           |
| $\text{Eu}_{0.45}\text{NbO}_{3.175}$           | 0.45 for Eu      | 2           |
| $\text{Na}_5\text{CaIn}_{1.67}\text{Sb}_4$     | 0.83 for In      | 3           |
| $\text{La}_3\text{In}_{0.34}\text{GeS}_7$      | 0.341 for In     | 4           |

**Table S6.** The In–S distances in literature.

| <b>Compounds</b>                                            | <b><math>d(\text{In-S})/\text{\AA}</math></b> | <b>Ref.</b> |
|-------------------------------------------------------------|-----------------------------------------------|-------------|
| $\text{NaIn}_3\text{S}_5$                                   | 2.504–2.929                                   | 5           |
| $\text{Ba}_{18}\text{F}_{18}\text{In}_8\text{S}_{21}$       | 2.383–2.941                                   | 6           |
| $\text{Fe}_{1.5}\text{Pb}_{5.5}\text{In}_{10}\text{S}_{22}$ | 2.479–2.952                                   | 7           |
| $\text{Ca}_{0.76}\text{In}_{2.84}\text{S}_5$                | 2.479–2.916                                   | 8           |
| $\text{La}_4\text{Ag}_2\text{In}_4\text{S}_{13}$            | 2.401–2.932                                   | 9           |

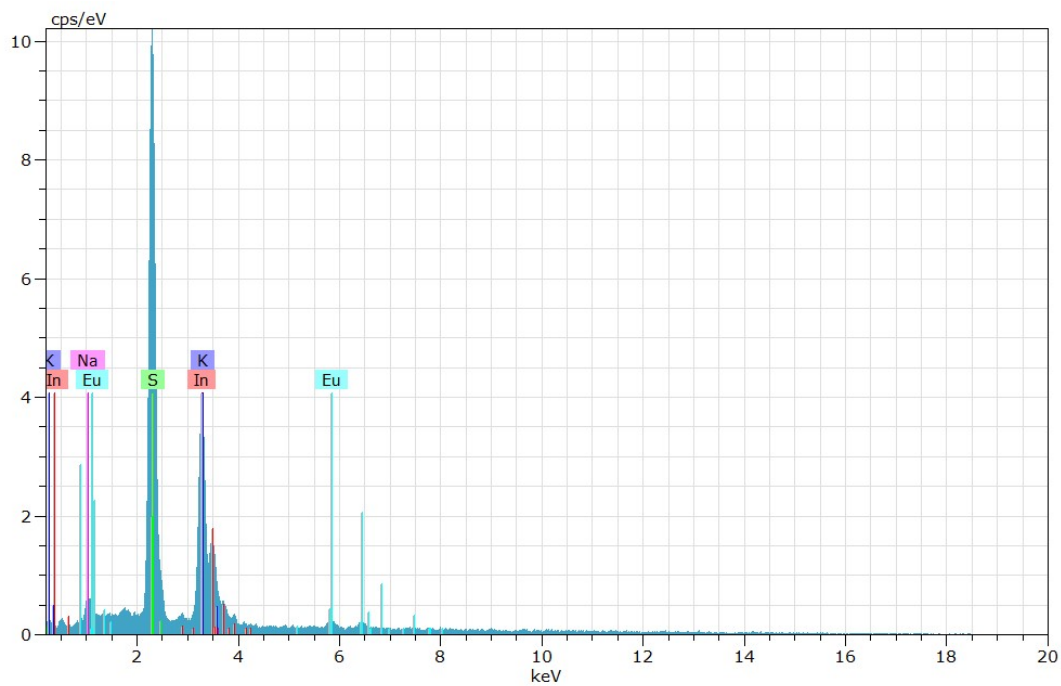

**Fig. S1** EDS analysis for **1**.

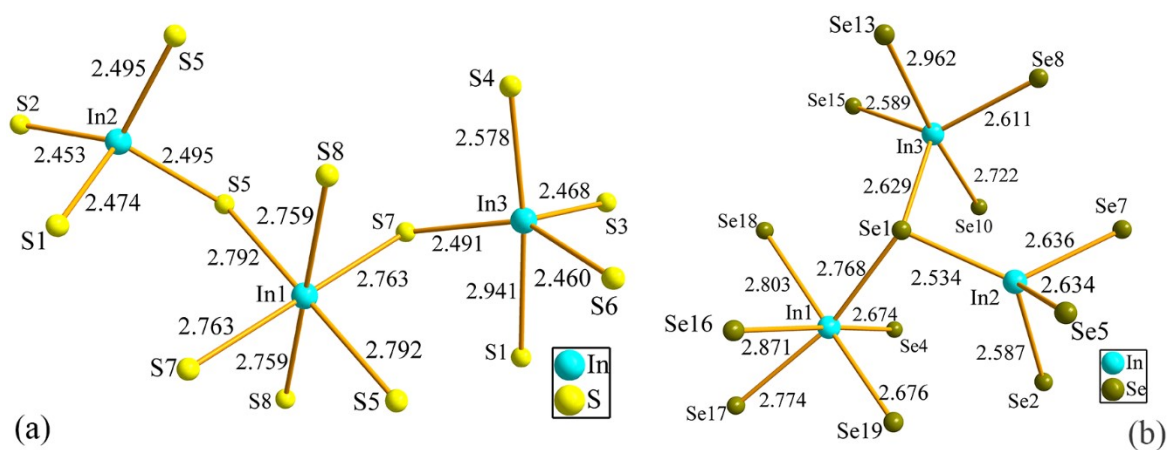

**Fig. S2** Diverse  $\text{InQ}_x$  coordination styles in **1** (a) and  $\text{K}_5\text{In}_3\text{P}_6\text{Se}_{19}$  (b).

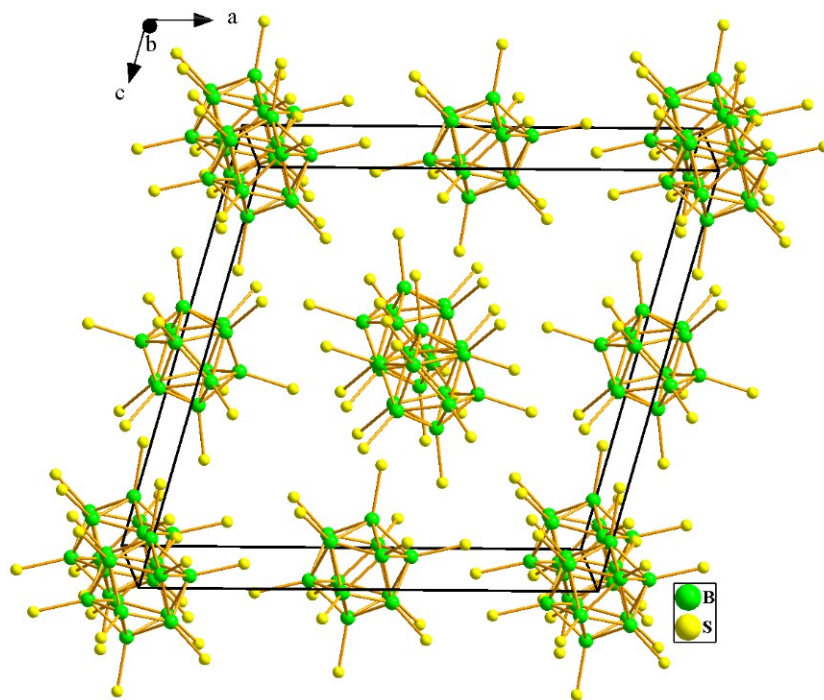

**Fig. S3** The unit cell of  $\text{KNa}_{0.78}\text{Eu}_{0.27}\text{In}_{3.80}\text{B}_{12}\text{S}_{12}$ . For clarity, only those B and S atoms in the above.

1. MR Álvarez-López, A Ritter, C Pietzonka and B Harbrecht, Tantalum Clusters in Oxidic Matrices — Synthesis, Crystal Structure and Magnetic Properties of  $\text{Eu}_{1.83}\text{Ta}_{15}\text{O}_{32}$ , *Z. Anorg. Allg. Chem.*, 2004, **630**, 858–863.
2. K. Toda, M. Honda, Y. Ishimoto, Z.-G. Ye and M. Sato, Oxygen Defect in Non-stoichiometric Europium Orthoniobate,  $\text{Eu}_x\text{NbO}_{4-1.5(1-x)}$ , *Solid State Ionics*, 2000, **136**, 25–30.
3. Y. Wang, S. Stoyko and S. Bobev, Quaternary Pnictides with Complex, Noncentrosymmetric Structures. Synthesis and Structural Characterization of the New Zintl Phases  $\text{Na}_{11}\text{Ca}_2\text{Al}_3\text{Sb}_8$ ,  $\text{Na}_4\text{CaGaSb}_3$ , and  $\text{Na}_{15}\text{Ca}_3\text{In}_5\text{Sb}_{12}$ , *Inorg. Chem.*, 2015, **54**, 1931–1939.
4. Y.-F. Shi, Y. Chen, M.-C. Chen, L.-M. Wu, H. Lin, L.-J. Zhou and L. Chen, Strongest Second Harmonic Generation in the Polar  $\text{R}_3\text{MTQ}_7$  Family: Atomic Distribution Induced Nonlinear Optical Cooperation, *Chem. Mater.*, 2015, **27**, 1876–1884.
5. H. Y. Zeng, M. J. Zhang, B. W. Liu, N. Ye, Z. Y. Zhao, F. K. Zheng, G. C. Guo and J. S. Huang,  $\text{NaIn}_3\text{S}_5$ , a New Compound from the  $\text{CaS-In}_2\text{S}_3/\text{NaBr}$  System, *J. Alloy. Compd.*, 2015, **624**, 279–283.
6. Z.-Z. Luo, C.-S. Lin, W.-L. Zhang, H. Zhang, Z.-Z. He and W.-D. Cheng,  $\text{Ba}_{18}\text{F}_{18}\text{In}_8\text{S}_{21}$  and  $\text{Ba}_9\text{F}_{10}\text{In}_4\text{S}_{10}$ : New Kind of Mixed Anion Compounds with The Novel Low-dimensional Structure, *CrystEngComm*, 2014, **16**, 2788–2794.
7. Y. Matsushita and Y. Ueda, Crystal Structure and Physical Properties of  $\text{Fe}_{1.5}\text{Pb}_{5.5}\text{In}_{10}\text{S}_{22}$ , *Inorg. Chem.*, 2006, **45**, 2022–2026.
8. B. Eisenmann and A. Hofmann, Crystal Structure of a Calcium Thioindate,  $\text{Ca}_{0.76}\text{In}_{2.84}\text{S}_5$ , *Z. Kristallogr.*, 1991, **197**, 165–166.
9. L. D. Gulay, M. Daszkiewicz and M. R. Huch, Crystal structures of the  $\text{Ln}_{4-x}\text{In}_{5-y}\text{S}_{13}$  ( $\text{Ln} = \text{La, Ce, Pr and Nd}$ ;  $x=0.08-0.12$ ,  $y = 0.21-0.24$ ),  $\text{La}_3\text{In}_{1.67}\text{S}_7$ ,  $\text{Gd}_3\text{InS}_6$  and  $\text{La}_4\text{Ag}_2\text{In}_4\text{S}_{13}$  compounds, *J. Solid State Chem.*, 2008, **181**, 2626–2632.
